# Supplementary material for: Through-hole graphite made from waste graphite for high-rate lithium-ion battery anodes
Source: Royal Society of Chemistry journal article supplement (doi:10.1039/d2ta09965a), 2023-01-01
Supplement: d2ta09965a1.pdf [file d2ta09965a1.pdf]

## Electronic Supplementary Information

### Through-hole graphite made from waste graphite for high rate lithium-ion battery anode electrodes

ShanLin Gao,<sup>†ab</sup> Lv Yan,<sup>‡ab</sup>, Jieming Qin,<sup>\*ab</sup> Rui Liu,<sup>a</sup> Benkuan Liang,<sup>a</sup> Qi wang,<sup>a</sup>  
Mingchen Gen<sup>a</sup> and Bo Wang<sup>a</sup>

<sup>a</sup> Department of Materials Science and Engineering, Changchun University of Science and Technology, 7989 Weixing Road, Changchun, 130022, China

<sup>b</sup> Advanced Graphite Manufacturing Industry College, Changchun University of Science and Technology, 7989 Weixing Road, Changchun, 130022, China

\*Corresponding contributor. E-mail: [qinjieming@cust.edu.cn](mailto:qinjieming@cust.edu.cn)

<sup>†</sup> Electronic supplementary information (ESI).

<sup>‡</sup> These authors contributed equally.

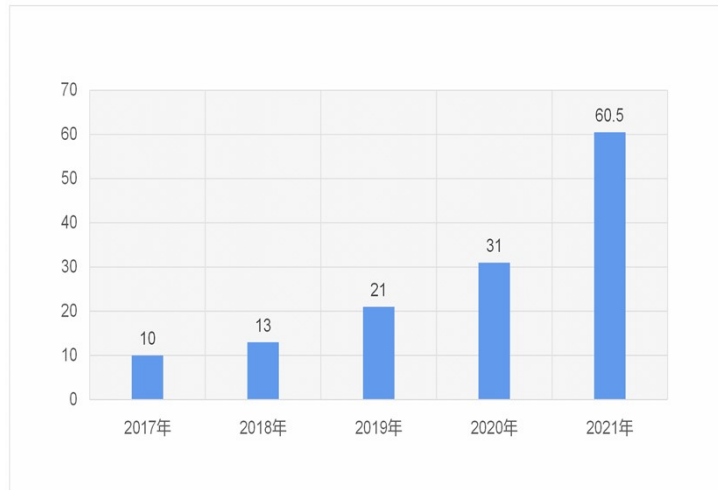

Fig. S1 Shipments of artificial graphite in China from 2017 to 2021 (10, 000 tons)

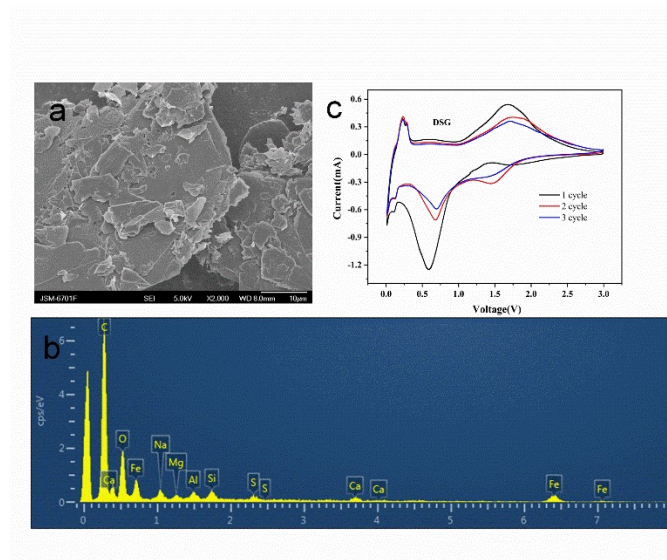

Fig. S2 SEM characterization of DSG (a). Energy dispersive spectroscopy of DSG (b).

Cyclic voltammetry curve of DSG with scanning rate of  $0.1 \text{ mV s}^{-1}$  between 0.001 V

to 3 V.

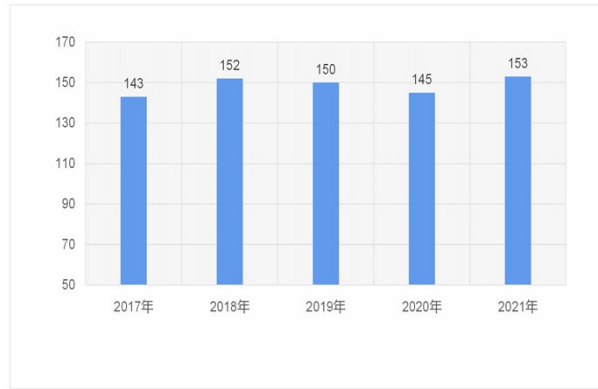

Fig. S3 Output of abrasive grade diamond in China from 2017 to 2021 (100 million carats)

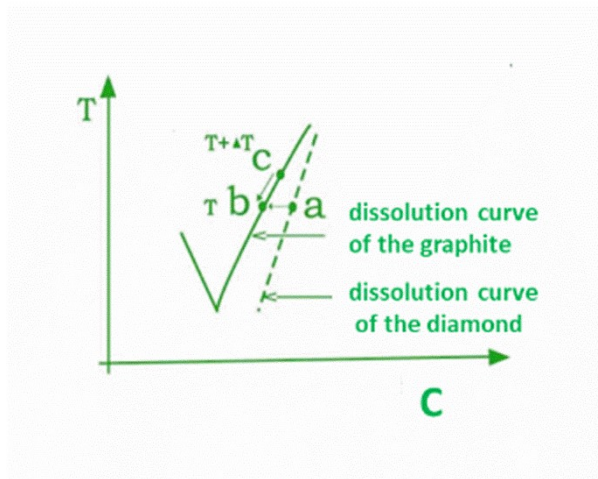

Fig. S4 Solubility curve of diamond and graphite

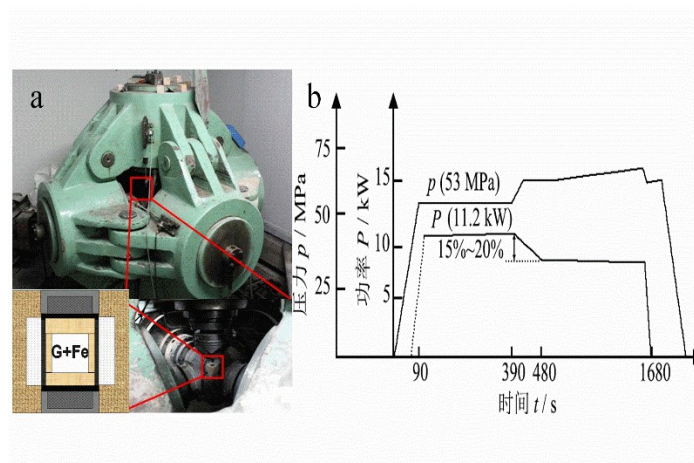

Fig. S5 hinged six-sided top hydraulic press (a). Diamond synthesis technology (b).

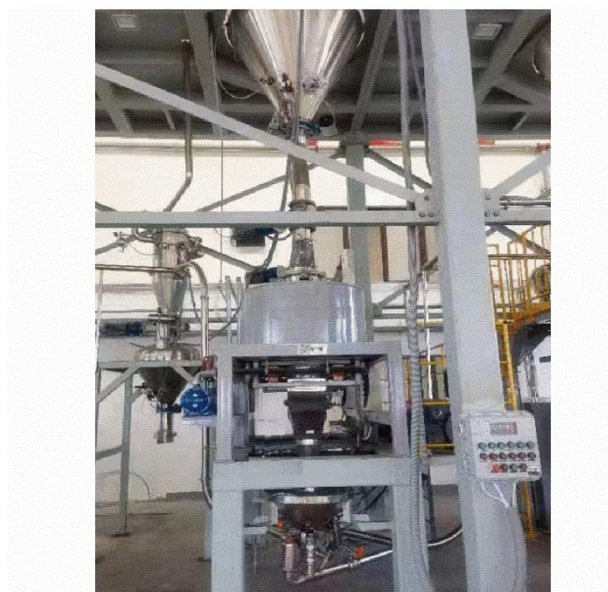

Fig. S6 Photos of magnetic separation equipment

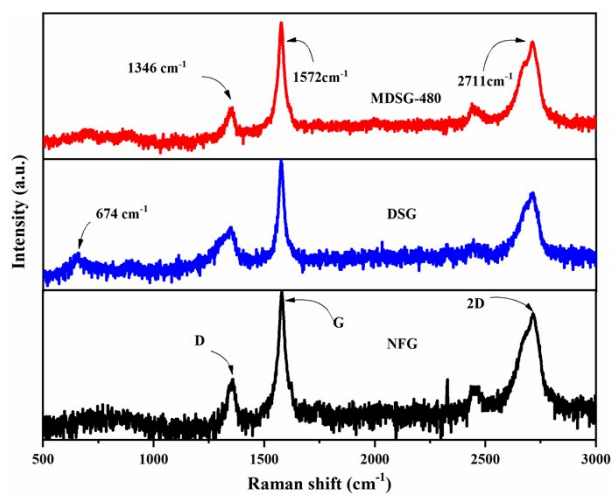

Fig. S7 Raman spectra of NFG, DSG, and DMSG-480 samples

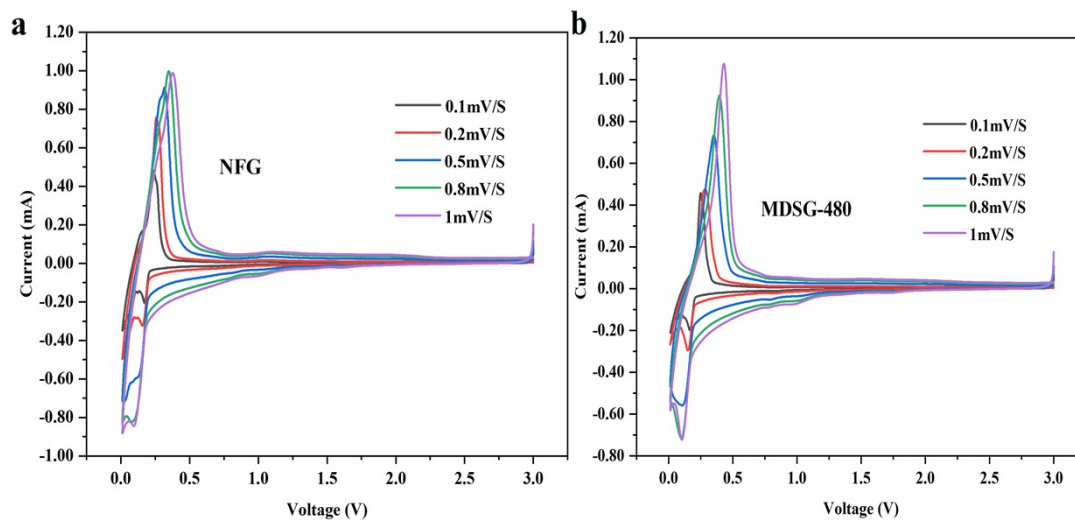

Fig. S8 Cyclic voltammetry curve of NFG (a), MDSG-480 (b).

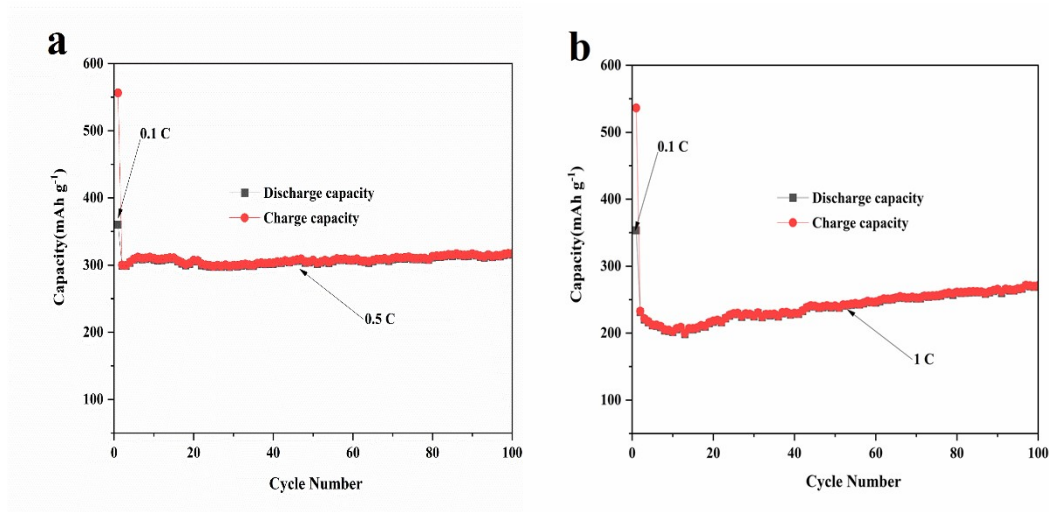

Fig. S9 Long cycle performance of MSG-480 at 0.5 C (a) and 1C (b).

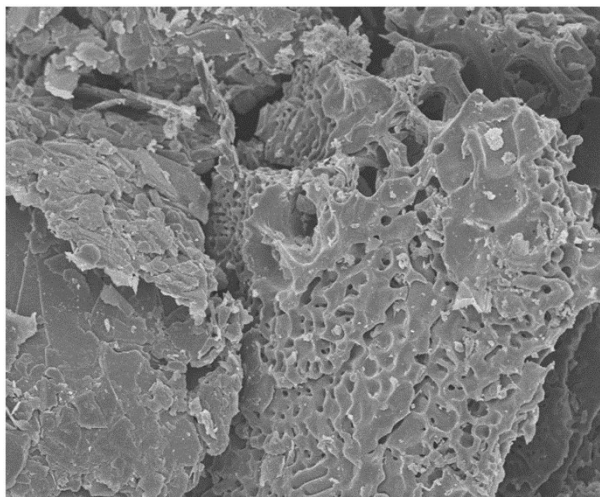

Fig. S10 Microstructure of electrode material after 1000 cycles of MDSG-480.

Table S1 ICP-OES measurement results of DSG and MDSG-480

| samples  | Fe (ppm)   | Si (ppm) | Mg (ppm) | Ga (ppm) | Al (ppm) |
|----------|------------|----------|----------|----------|----------|
| DSG      | 38980±2898 | 735±73.5 | 813±81.3 | 297±81.3 | 231±17.4 |
| MDSG-480 | 30±3.4     | 284±28.4 | 121±32.1 | 100±7    | 88±21.6  |
